# Supplementary material
Source: PubMed Central journal article supplement (PMC140065)
Supplement: nar_30_24_5539__1.pdf [file nar_30_24_5539__1.pdf]

**I6A: SELEX (1-5)**

1. aggat ACCACCGTGACCCACAGCG ttgca
2. aggat ACCACCGTGACCCATTCCG ttgca
3. aggat AGTACCACGGTGACCCCT ttgca
4. aggat ATACCACCGTGGCACCACCG tGgca (6)
5. aggat ATAGGGCCACGGTGGCCCTA ttgca
5. aggat ATGTACCACCGTGACCCAC ttgca
7. aggat CACACC'TTATTGACCGCCT ttgca
3. aggat GACCCACCGTGATACCACG ttgca (2)
9. aCgat GGGGCCACCGTGGACCCATG ttgca (6)
10. aggat GTGGGGTTCACGGTGGCACTA ttgca

**I6G: (SELEX 4)**

1. aggat ACCACCGTGGTACTACTACA ttgca
2. aggat AGCACCACCGTGGTACTACA ttgca
3. aggat ATAATACCACGGTGGCCCA ttgca
4. agAat ATACCACCGTGGCACCACCG tGgca (14)
5. aggat ATACCACCGTGGTACCACCG tGgca

**I6I: (SELEX 9)**

1. aggat ATACCACCGTGGCACCACCG tGgca (6)
2. aggat ATACCACCGTGGTACCACCG tGgca
3. aggat GACCCACCGTGGAAACCACC ttgca (2)
4. aggat GACCCACCGTGATACCACG ttgca (7)

**I6L: (SELEX 7)**

1. aggat AATACCACGGTGGTATTACT ttgca (3)
2. Gggat ATACCACCGTGGTACCACCG tGgTa (3)
3. agTat ATACCACCGTGGCACCACCG tGgTa

**I6M: (SELEX 5)**

1. aggat AATACCACGGTGGTATTACTT ttgca
2. aggat AATACCACGGTGGTATTATG ttgca (3)
3. aggat AATATCACGGTGGTATTAGT ttgca
4. aggat ATAATACCACCGTGGTATTA ttgca
5. aggat ATATCACGGTGGTATGATGA ttgca
5. aggat CATATCACCGTGGTATTATG ttgca
7. aggat GTAATACCACCGTGGTATCA ttgca
3. aggat GTCATACCACGGTGGTATTA ttgca
9. aggat GTCTTGGGCGTGGTCTAATT ttgca

**I6N: (SELEX 4)**

1. aggat AGATGCGCCCCGAGTCTTCT ttgca
2. aAgat ATACCACCGTGGCACCACCG tGgca (2)
3. aggat ATACCACCGTGGTACCACCG tGgca (6)
4. agTat ATACCGCCGTGGTACCACCG tGgca

**I6Q: (SELEX 7)**

1. aggat AGACCACCGTGATACTAGTG ttgca
2. aggat AGGACCACCGTGATATACAG ttgca
3. aggat AGTAGCACGGTGGTATACAC ttgca
4. aggat ATACCACCGTGGCACCACCG tGgca
5. Gggat ATACCACCGTGGTACCACCT Gtgca
5. aggat CACGGTGGTATGATGAGCGT ttgca
7. aCTat AGGGCCACCGTGATACC'TT ttgca
3. aggat GACCACCACGGTGGTATACCACG ttgca
9. aggat GGTATCACCGTGGTATATGT ttgca
10. aggat GGTATCACCGTGGTGCATAA ttgca

**H6R: (SELEX 4)**

1. Gggat AATTGGCACCAATGTGACAG ttgca
2. aggat ATGGCTCTGGTGTGGTACCA ttgca
3. aggat CGCGCCACCGTGGCTACGCA ttgca
4. agCat GAGCCATATTGGTGCTTATG ttgca
5. aggat GATGCCATGGTGGCAGCCGGA ttgca
6. aggat GATGTCAATTTGGCTCTGCT ttgca
7. aggat GGTTTTGTGGGGCGGTGTCA ttgca
8. aggat GTAGTGCATGCGTGGTACCA ttgca
9. aggat GTCACAGTGGCGCAAATG ttgca
10. aggat TGCGGGCCACGGTGGACTCT ttgca

**H6S: (SELEX 4)**

1. aggat ATACCACCGTGGCACCACCG tGgca (4)
2. aggat GGGGCCACCGTGGACCCATG ttgca (11)
3. aggat GGGGCCACCGTGGACCCATT ttgca

**H6T: (SELEX 4)**

1. aggat GACCCACCGTGGAAACCACA ttgca
2. aggat GGGGCCACCGTGGACCCATG ttgca
3. aggat GGGGCCACCGTGGTACCCATG ttgca (3)
4. aggat GGGGCCACCGTGCACCCATG ttgca
5. aggat ATACCACCGTGGCACCACCG tGgca (3)

**H6V: (SELEX 4)**

1. aggat ATACCACCGTGGCACCACCG tGgca (9)
2. aggat GACCCACCGTGATACCACG ttgca (7)

**Mnt: (SELEX 3 and 7)**

1. aggat AATGATGCTTGCCAGCGAC ttgca
2. aggat AGGGCCACCGTGGACCCATT ttgca (3)
3. aTgat ATAGGGCCACCGTGGCCCA ttgca
4. aggaG CCAGTTGTCCGAGTCCGA ttgca
5. aggat CGGAGATGACGGCCTTGCT ttgca
6. aggat GACCCACCGTGATACCACG ttgca
7. aggat GCCCCACCAATCATTTGAC ttgca
8. aggat GGGGCCACCGTGGACCCATG ttgca (11)
9. agCat GGGGCCACCGTGGACCCATT ttgAa
10. aggat GGTATGGATTGGTGTCCACGC ttgca

**Mnt78: (SELEX 3)**

1. aggat ATAGGGCCACCGTGGCCCTA ttgca
2. GAgGt CCACCGTGGCCCTACTACTA ttgca
3. aggat CGGGGAATTGTCCGGTTAT ttgca
4. aggat GGGGCCACCGTGGACCCATG ttgca (6)
5. Tggat GGGTCCACCGTGGACCCATG ttgca

**Mnt79: (SELEX 3)**

1. TAgat AGGGCCACCGTGGACCCATT ttgAa
2. agAat AGGGCCACCGTGGACCCACC ttgca
3. Gggat ATAGGGCCACCGTGGCCCA ttgca
4. aggat GAGTTGGCCCGGATGACGT ttgca
5. aggat GGGGCCACCGTGGACCCATG ttgca (3)
6. aggat GGTCCACCGTGGACCCATG ttgca
7. aggat TGTGGACCACCGTGGCCCA ttgca
8. aggat TTAGGGCCACCGTGGCCCTG ttgca
9. GAgat TTGAGGAGGACGGGTGGTC ttgca
