# Supplementary material
Source: PubMed Central journal article supplement (PMC140065)
Supplement: nar_30_24_5539__2.pdf [file nar_30_24_5539__2.pdf]

| #↓ | 3 | 4 | 5         | 6         | 7 | 8 | 9 | 10       | 11 | 12       | 13 | 14 | 15 | 16        | 17        | 18 | 19 |
|----|---|---|-----------|-----------|---|---|---|----------|----|----------|----|----|----|-----------|-----------|----|----|
| 1  | A | G | <b>A*</b> | <b>T*</b> | C | C | A | <b>A</b> | S  | <b>T</b> | T  | G  | G  | <b>A*</b> | <b>T*</b> | C  | T  |
| 2  | A | G | <b>A*</b> | <b>T*</b> | C | C | A | <b>C</b> | S  | <b>G</b> | T  | G  | G  | <b>A*</b> | <b>T*</b> | C  | T  |
| 6  | A | G | <b>C</b>  | <b>T</b>  | C | C | A | <b>C</b> | S  | <b>G</b> | T  | G  | G  | A         | <b>G</b>  | C  | T  |
| 7  | A | G | <b>C</b>  | <b>T</b>  | C | C | A | <b>G</b> | S  | <b>C</b> | T  | G  | G  | A         | <b>G</b>  | C  | T  |
| 9  | A | G | <b>G</b>  | <b>T</b>  | C | C | A | <b>A</b> | S  | <b>T</b> | T  | G  | G  | A         | <b>C</b>  | C  | T  |
| 10 | A | G | <b>G</b>  | <b>T</b>  | C | C | A | <b>C</b> | S  | <b>G</b> | T  | G  | G  | A         | <b>C</b>  | C  | T  |
| 11 | A | G | <b>G</b>  | <b>T</b>  | C | C | A | <b>G</b> | S  | <b>C</b> | T  | G  | G  | A         | <b>C</b>  | C  | T  |
| 13 | A | G | <b>T</b>  | <b>T</b>  | C | C | A | <b>A</b> | S  | <b>T</b> | T  | G  | G  | A         | <b>A</b>  | C  | T  |
| 14 | A | G | <b>T</b>  | <b>T</b>  | C | C | A | <b>C</b> | S  | <b>G</b> | T  | G  | G  | A         | <b>A</b>  | C  | T  |

Table S1. Operator Sequences used in interference selection. Positions of interest for the work presented here are 5,10,12,17 and are shown in bold. Position 11 is 'S', where S = (G or C). The wild-type operator is shown here as operator #10. In the wild-type interaction, His 6 has been shown to hydrogen bond with the guanines at operator positions 5 and 17. Arg 2 has been shown to interact with the guanines at operator positions 10 and 12. A\* and T\* indicate that the A's of those base-pairs are methylated by *dam* methylase.

|    | Codons |     | Residues |     |
|----|--------|-----|----------|-----|
| #↓ | 2      | 6   | 2        | 6   |
| 1  | AGG    | CAT | Arg      | His |
| 2  | AGG    | CAT | Arg      | His |
| 3  | AGG    | CAT | Arg      | His |
| 4  | CGC    | CAT | Arg      | His |
| 5  | AGG    | CAC | Arg      | His |
| 6  | CGT    | AGC | Arg      | Ser |
| 7  | AGG    | CAC | Arg      | His |
| 8  | CGC    | CAT | Arg      | His |
| 9  | AGG    | CAT | Arg      | His |
| 10 | AGG    | CAT | Arg      | His |
| 11 | CGC    | ACC | Arg      | Thr |

Table S2. Selected codons and amino acids using the wild-type operator. Sequence of Mnt positions 2 and 6 from the 11 true positive colonies selected with the wild-type operator.

|    | Codons  | Residues |
|----|---------|----------|
| #↓ | 2 6     | 2 6      |
| 1  | AGA CCA | Arg Pro  |
| 2  | CGA CCC | Arg Pro  |
| 3  | CGG CCT | Arg Pro  |
| 4  | CGA CCA | Arg Pro  |
| 5  | CGG CCC | Arg Pro  |
| 6  | AGG CCA | Arg Pro  |
| 7  | CGT ACT | Arg Thr  |

Table S3. Selected codons and amino acids using the operator #2 (A at position 5). All codons combinations are different; 5 of the 6 Arg codons are represented, as are 3 of the 4 Pro codons.

|    | Codons |     | Residues |     |
|----|--------|-----|----------|-----|
| #↓ | 2      | 6   | 2        | 6   |
| 1  | CGC    | TCA | Arg      | Ser |
| 2  | CGC    | TCG | Arg      | Ser |
| 3  | CGG    | CCG | Arg      | Pro |
| 4  | CGC    | ATG | Arg      | Met |
| 5  | CGC    | ATT | Arg      | Ile |
| 6  | CGC    | GTT | Arg      | Val |
| 7  | CGC    | ATC | Arg      | Ile |
| 8  | CGC    | GTT | Arg      | Val |
| 9  | CGG    | CCC | Arg      | Pro |
| 10 | CGG    | GCA | Arg      | Ala |
| 11 | CGC    | GGA | Arg      | Gly |
| 12 | AGG    | CCA | Arg      | Pro |

Table S4. Selected codons and amino acids using the operator #14 (T at position 5). 11 of the 12 codon combinations are unique.
